# Supplementary material for: Development of Olive Oil Containing Phytosomal Nanocomplex for Improving Skin Delivery of Quercetin: Formulation Design Optimization, In Vitro and Ex Vivo Appraisals
Source: MDPI journal article supplement (doi:10.3390/pharmaceutics15041124), 2023-03-31
Supplement: s1 [file s1]

### Optimization of UHPLC conditions

The effective determination of QC was achieved on ACCLAIM™ 120 C18 column and isocratic elution at flow rate of 0.7 mL/min with a mobile phase consisting of water acidified by phosphoric acid (pH ~3) and acetonitrile. A different proportion of water acidified by phosphoric acid (pH ~3) and acetonitrile was tested; (40: 60 v/v). Also the detection wavelength and column temperature were tested and 210 nm and 25 °C were chosen. Under the optimum condition; the total run time of the HPLC method was 7 min. QC was detected at 5.27 min as retention time as shown in Fig. S1. Calibration curve was linear over a range of 0.02-80 µg/mL (Fig. S2), and the equation was  $A=1.3633C +0.2755$  with a correlation coefficient ( $r^2$ ) value of 0.9998 as depicted in Table S1.

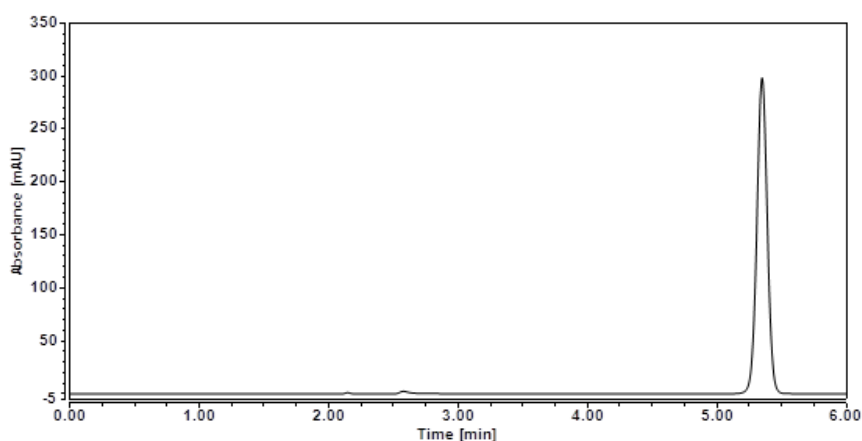

**Figure S1. HPLC chromatogram of QC**

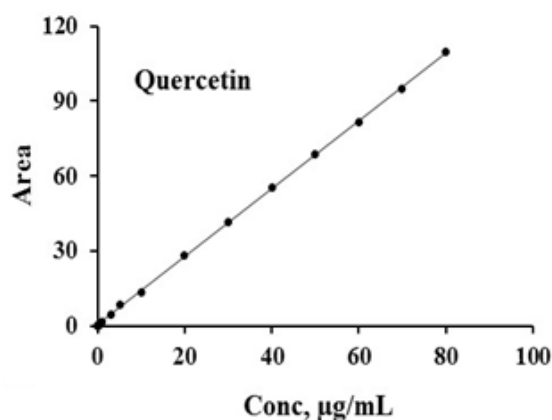

**Figure S2: Calibration curve of QC**

**Table S1.** Results of assay validation parameters of the proposed HPLC method for determination of QC

| Parameter      | QC              |
|----------------|-----------------|
| Range          | 0.02- 80 µg/ mL |
| Slope          | 1.3633          |
| Intercept      | 0.2755          |
| R <sup>2</sup> | 0.9998          |
| LOD*           | 0.004 µg/ mL    |
| LOQ*           | 0.0133 µg/ mL   |
| Recovery %     | 94.41- 98.19    |
| RSD%           | 0.66 - 2.80     |

**Table S2:** ANOVA for Quadratic model of response 1: Particle Size

| Source                        | Sum of Squares | df | Mean Square | F-value | p-value |                 |
|-------------------------------|----------------|----|-------------|---------|---------|-----------------|
| <b>Model</b>                  | 7761.69        | 9  | 862.41      | 20.72   | 0.0003  | significant     |
| A-Olive oil: PC ratio         | 915.92         | 1  | 915.92      | 22.01   | 0.0022  |                 |
| B-PC:QC ratio                 | 1367.64        | 1  | 1367.64     | 32.86   | 0.0007  |                 |
| C-Concentration of surfactant | 1716.98        | 1  | 1716.98     | 41.26   | 0.0004  |                 |
| AB                            | 2097.64        | 1  | 2097.64     | 50.40   | 0.0002  |                 |
| AC                            | 9.00           | 1  | 9.00        | 0.2163  | 0.6560  |                 |
| BC                            | 59.29          | 1  | 59.29       | 1.42    | 0.2715  |                 |
| A <sup>2</sup>                | 739.21         | 1  | 739.21      | 17.76   | 0.0040  |                 |
| B <sup>2</sup>                | 750.41         | 1  | 750.41      | 18.03   | 0.0038  |                 |
| C <sup>2</sup>                | 60.80          | 1  | 60.80       | 1.46    | 0.2660  |                 |
| <b>Residual</b>               | 291.32         | 7  | 41.62       |         |         |                 |
| Lack of Fit                   | 204.20         | 3  | 68.07       | 3.13    | 0.1499  | not significant |
| Pure Error                    | 87.12          | 4  | 21.78       |         |         |                 |
| <b>Cor Total</b>              | 8053.02        | 16 |             |         |         |                 |

**Table S3: ANOVA for Quadratic model of response 2: Zeta potential**

| Source                        | Sum of Squares | df | Mean Square | F-value | p-value |                 |
|-------------------------------|----------------|----|-------------|---------|---------|-----------------|
| <b>Model</b>                  | 81.37          | 9  | 9.04        | 4.70    | 0.0268  | significant     |
| A-Olive oil: PC ratio         | 12.00          | 1  | 12.00       | 6.24    | 0.0412  |                 |
| B-PC:QC ratio                 | 13.26          | 1  | 13.26       | 6.89    | 0.0342  |                 |
| C-Concentration of surfactant | 1.71           | 1  | 1.71        | 0.8890  | 0.3771  |                 |
| AB                            | 20.70          | 1  | 20.70       | 10.75   | 0.0135  |                 |
| AC                            | 14.82          | 1  | 14.82       | 7.70    | 0.0275  |                 |
| BC                            | 0.0900         | 1  | 0.0900      | 0.0468  | 0.8350  |                 |
| A <sup>2</sup>                | 8.91           | 1  | 8.91        | 4.63    | 0.0684  |                 |
| B <sup>2</sup>                | 1.62           | 1  | 1.62        | 0.8408  | 0.3897  |                 |
| C <sup>2</sup>                | 8.02           | 1  | 8.02        | 4.17    | 0.0806  |                 |
| <b>Residual</b>               | 13.47          | 7  | 1.92        |         |         |                 |
| Lack of Fit                   | 10.40          | 3  | 3.47        | 4.51    | 0.0897  | not significant |
| Pure Error                    | 3.07           | 4  | 0.7680      |         |         |                 |
| <b>Cor Total</b>              | 94.84          | 16 |             |         |         |                 |

**Table S4: ANOVA for Quadratic model of response 3: EE%**

| Source                        | Sum of Squares | df | Mean Square | F-value | p-value  |                 |
|-------------------------------|----------------|----|-------------|---------|----------|-----------------|
| <b>Model</b>                  | 296.74         | 9  | 32.97       | 22.96   | 0.0002   | significant     |
| A-Olive oil: PC ratio         | 17.11          | 1  | 17.11       | 11.92   | 0.0107   |                 |
| B-PC:QC ratio                 | 21.45          | 1  | 21.45       | 14.94   | 0.0062   |                 |
| C-Concentration of surfactant | 118.58         | 1  | 118.58      | 82.59   | < 0.0001 |                 |
| AB                            | 0.0225         | 1  | 0.0225      | 0.0157  | 0.9039   |                 |
| AC                            | 31.36          | 1  | 31.36       | 21.84   | 0.0023   |                 |
| BC                            | 0.8100         | 1  | 0.8100      | 0.5642  | 0.4771   |                 |
| A <sup>2</sup>                | 103.06         | 1  | 103.06      | 71.78   | < 0.0001 |                 |
| B <sup>2</sup>                | 0.0400         | 1  | 0.0400      | 0.0279  | 0.8721   |                 |
| C <sup>2</sup>                | 6.34           | 1  | 6.34        | 4.42    | 0.0736   |                 |
| <b>Residual</b>               | 10.05          | 7  | 1.44        |         |          |                 |
| Lack of Fit                   | 7.42           | 3  | 2.47        | 3.77    | 0.1164   | not significant |
| Pure Error                    | 2.63           | 4  | 0.6570      |         |          |                 |
| <b>Cor Total</b>              | 306.79         | 16 |             |         |          |                 |

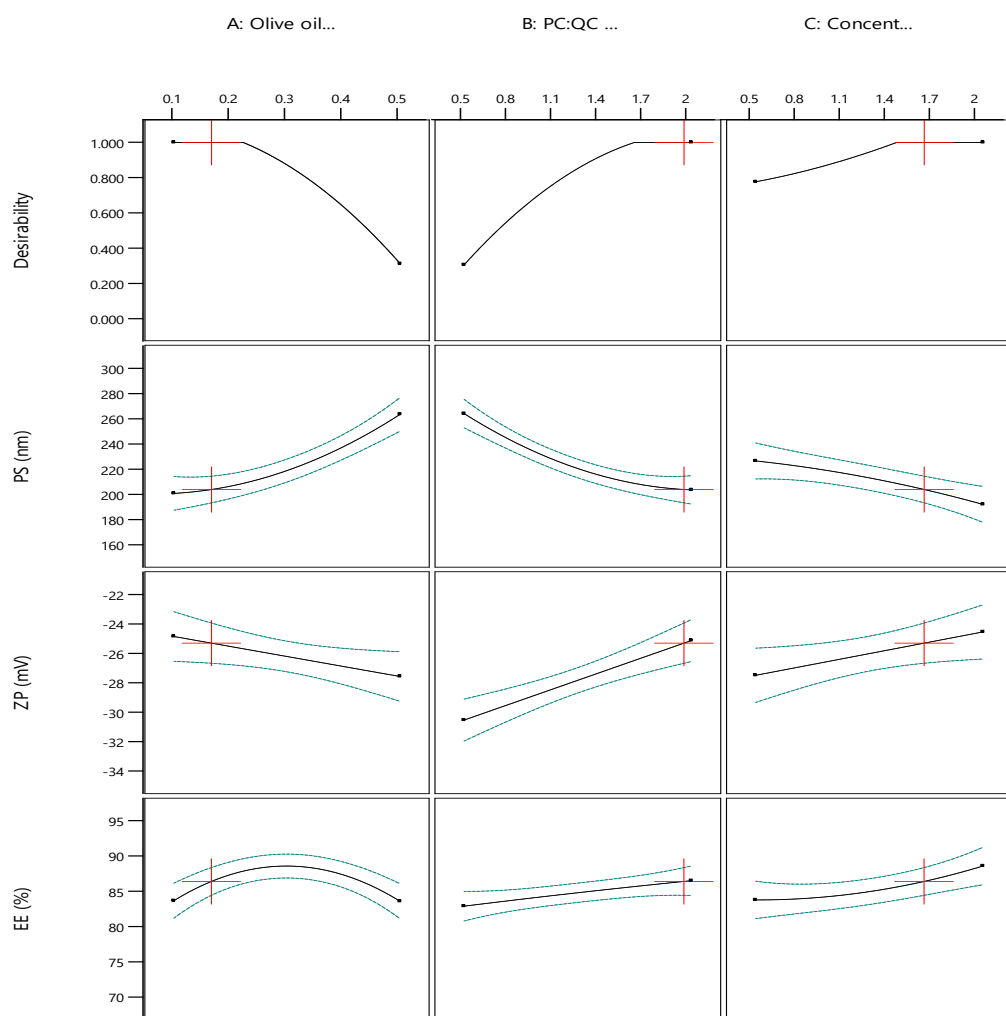

**Figure S3:** Predicted and actual values of independent variables and responses according to the desirability.
